# Supplementary material for: Aberrant Hypermethylation-Mediated Suppression of PYCARD Is Extremely Frequent in Prostate Cancer with Gleason Score ≥ 7
Source: Hindawi journal article supplement (doi:10.1155/2021/8858905), 2021-02-04
Supplement: f1 [file 8858905.f1.pdf]

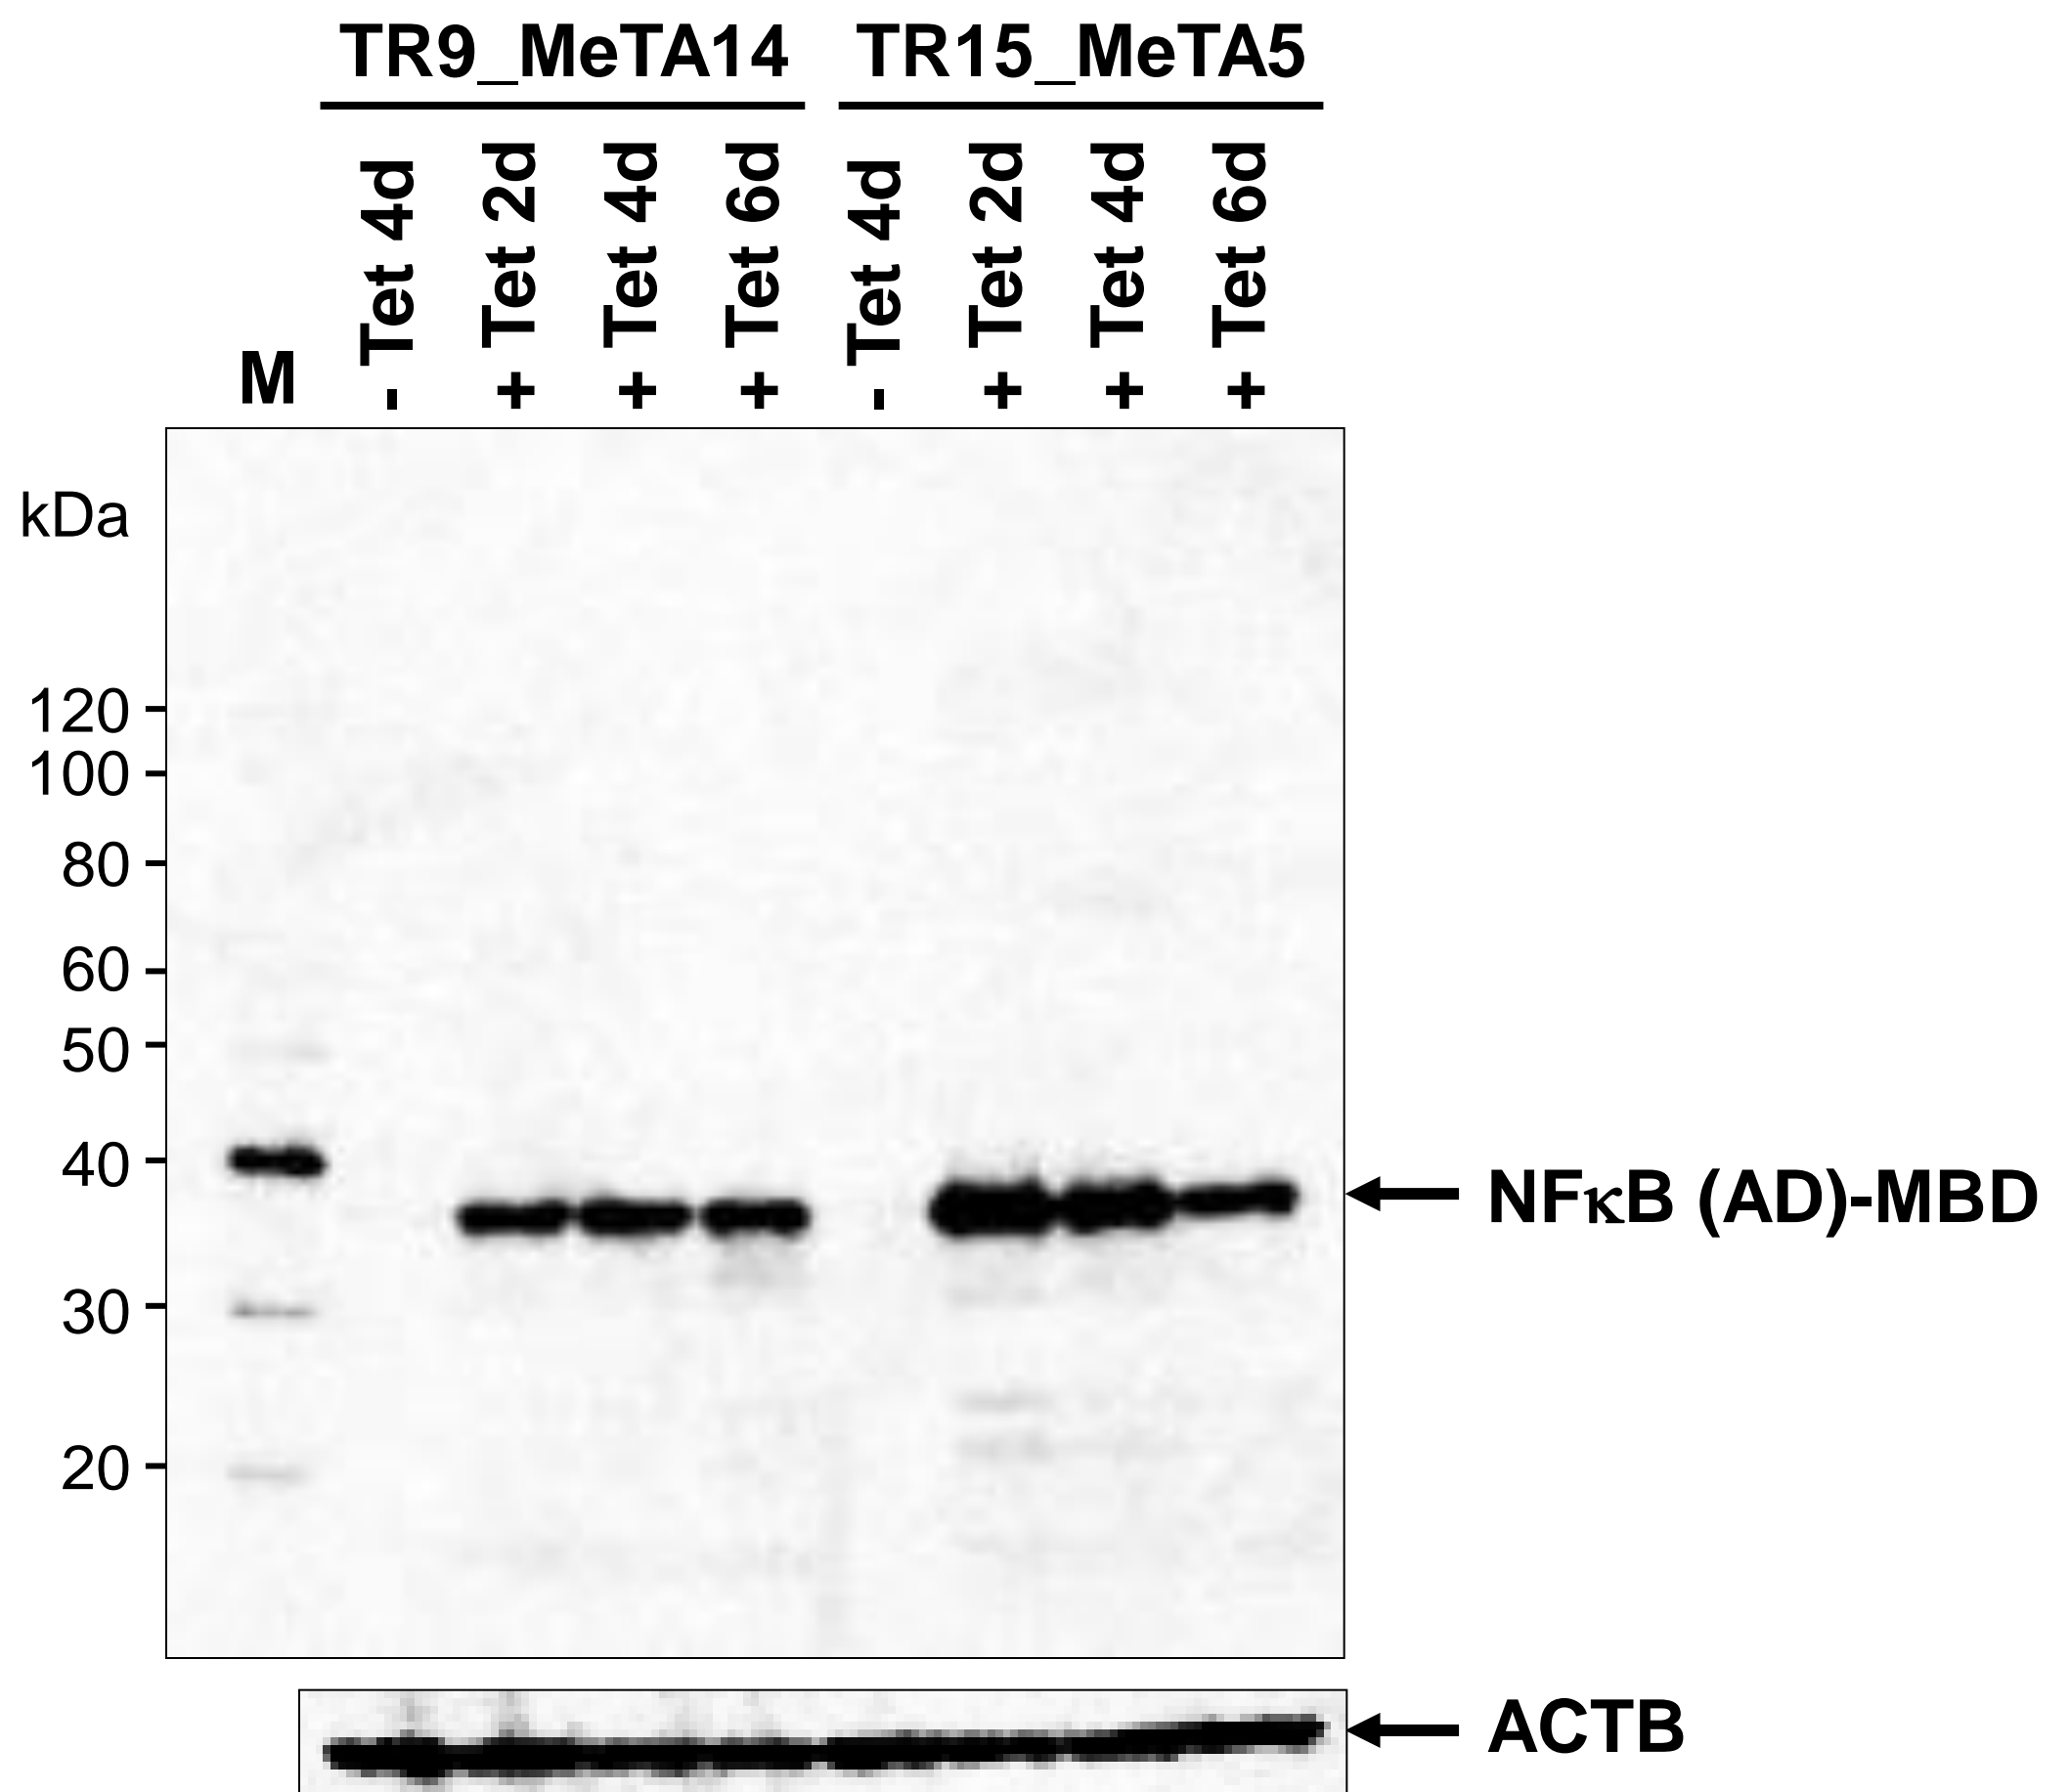

**Figure S1. NF $\kappa$ B (AD)-MBD induction by tetracycline addition.**

Immunoblotting analysis of NF $\kappa$ B (AD)-MBD protein using anti-FLAG antibody in LNCaP-derived cell lines. +Tet and -Tet denote with and without tetracycline treatment, respectively. NF $\kappa$ B (AD)-MBD protein expressions were observed at days 2, 4, and 6 after tetracycline treatment in both TR9\_MeTA14 and TR15\_MeTA5 cells. Lane M contained MagicMark XP Standard used for protein size estimation. ACTB was used as the endogenous control.
