# Supplementary material for: Aberrant Hypermethylation-Mediated Suppression of PYCARD Is Extremely Frequent in Prostate Cancer with Gleason Score ≥ 7
Source: Hindawi journal article supplement (doi:10.1155/2021/8858905), 2021-02-04
Supplement: f2 [file 8858905.f2.pdf]

## PYCARD

TR9\_MeTA14  
-Tet 4d

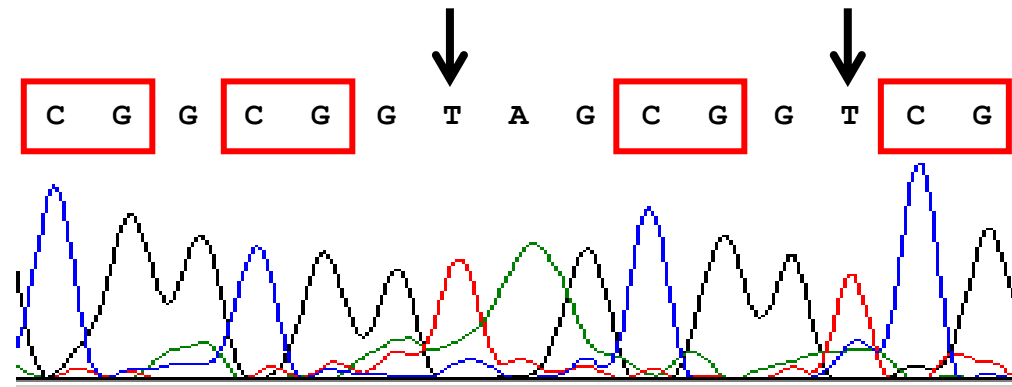

TR9\_MeTA14  
+Tet 4d

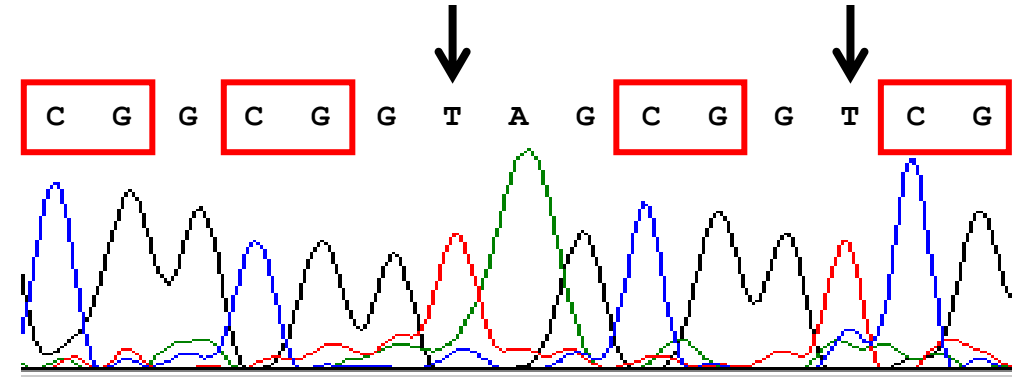

TR15\_MeTA5  
-Tet 4d

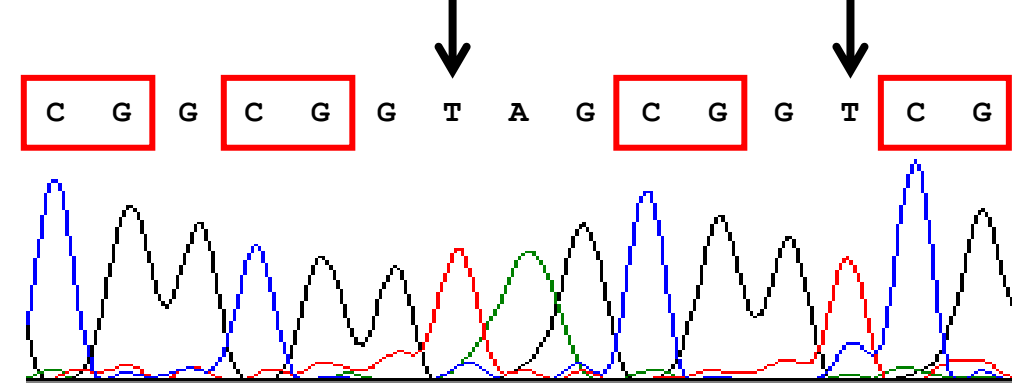

TR15\_MeTA5  
+Tet 4d

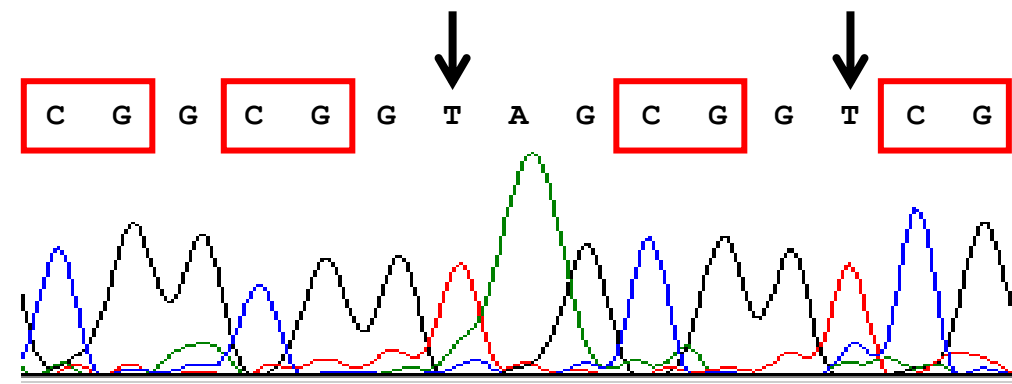

RWPE-1

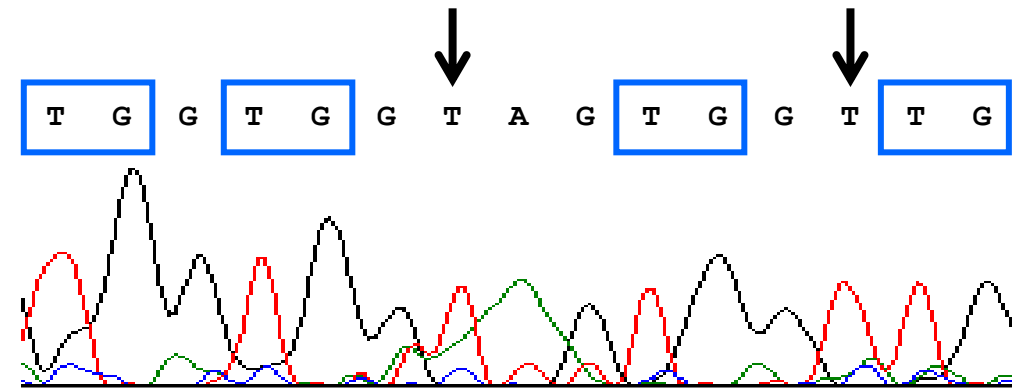

## TNFRSF25

TR9\_MeTA14  
-Tet 4d

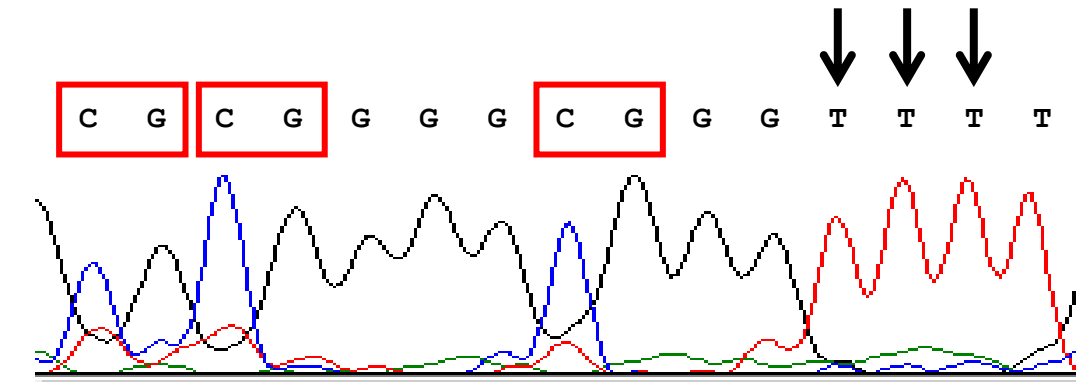

TR9\_MeTA14  
+Tet 4d

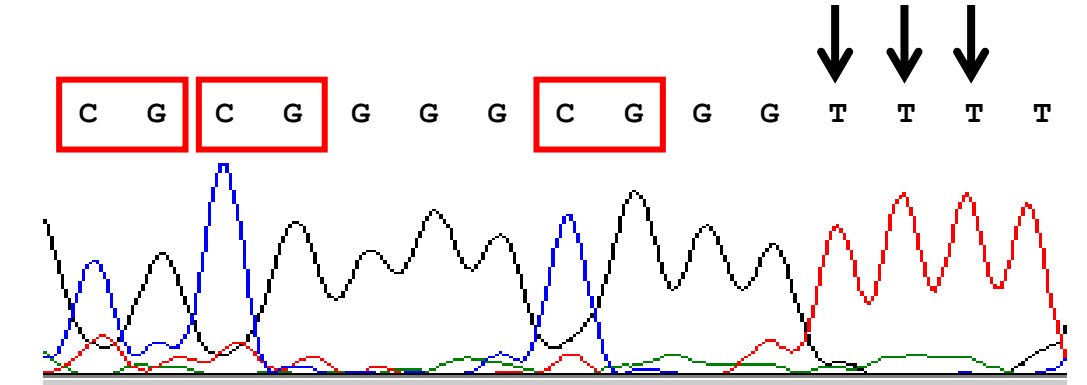

TR15\_MeTA5  
-Tet 4d

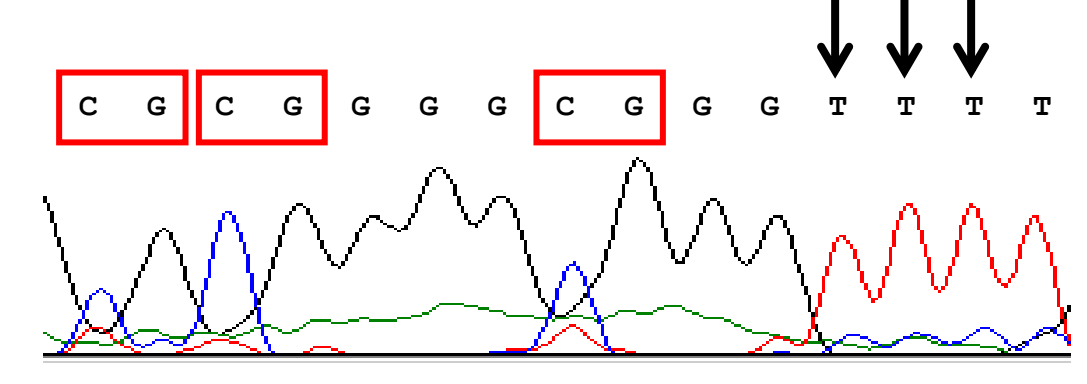

TR15\_MeTA5  
+Tet 4d

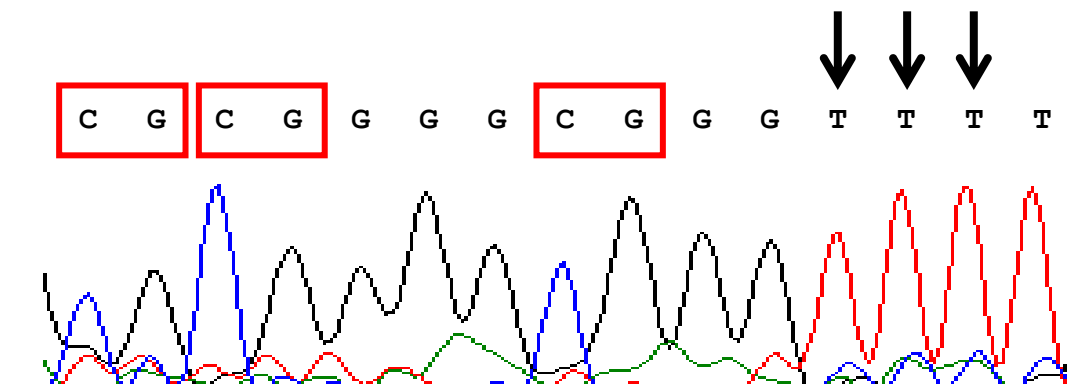

RWPE-1

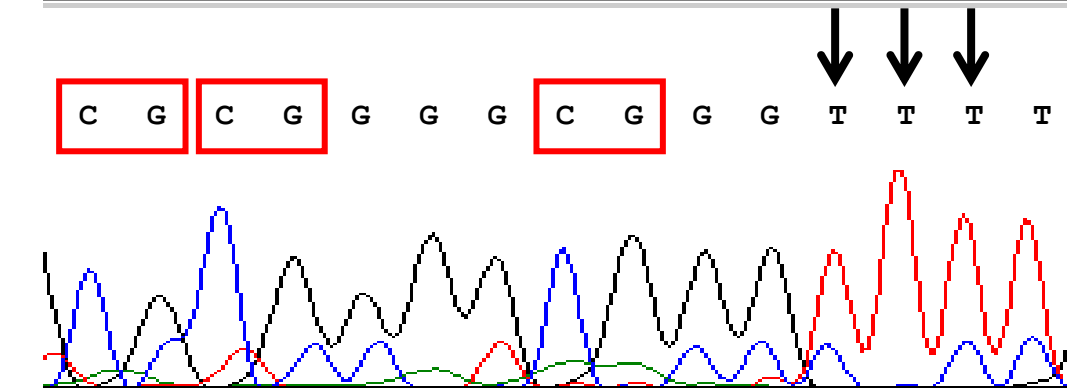

**Figure S2. Representative bisulfite sequencing results of *PYCARD* (left) and *TNFRSF25* (right) promoter regions.** *PYCARD* promoter region was highly methylated in LNCaP-derived prostate cancer cells but not in RWPE-1 normal prostate epithelial cells. Genomic DNAs were treated with sodium bisulfite and the promoter CGIs of *PYCARD* were sequenced. *TNFRSF25* promoter region was highly methylated both in LNCaP-derived prostate cancer cells and in RWPE-1 normal prostate epithelial cells. Arrows indicate the positions of cytosine residue converted by sodium bisulfite. Methylated CpG sites are boxed with red, and unmethylated CpG sites are boxed with blue.
