# Supplementary material for: Aberrant Hypermethylation-Mediated Suppression of PYCARD Is Extremely Frequent in Prostate Cancer with Gleason Score ≥ 7
Source: Hindawi journal article supplement (doi:10.1155/2021/8858905), 2021-02-04
Supplement: f3 [file 8858905.f3.pdf]

**A**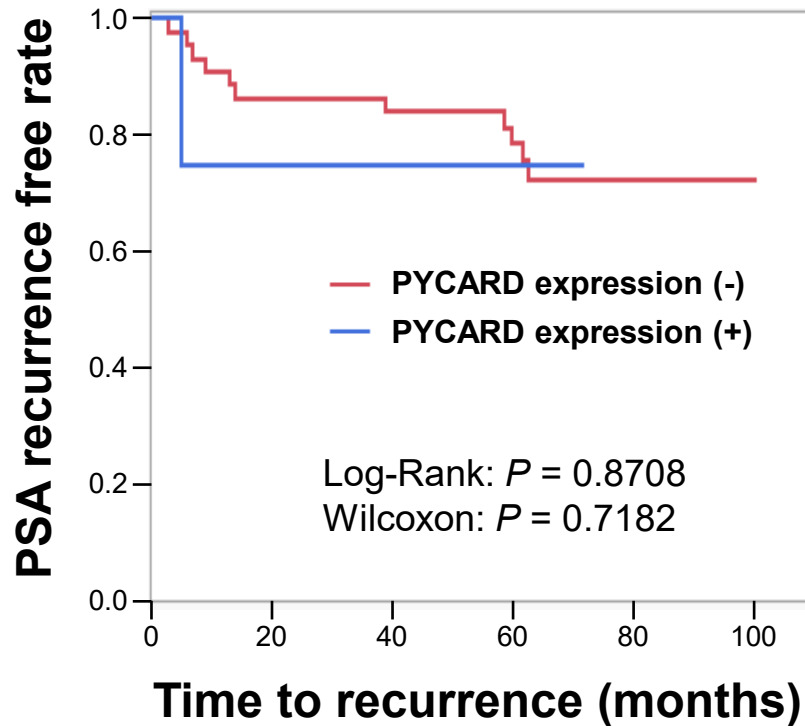**B**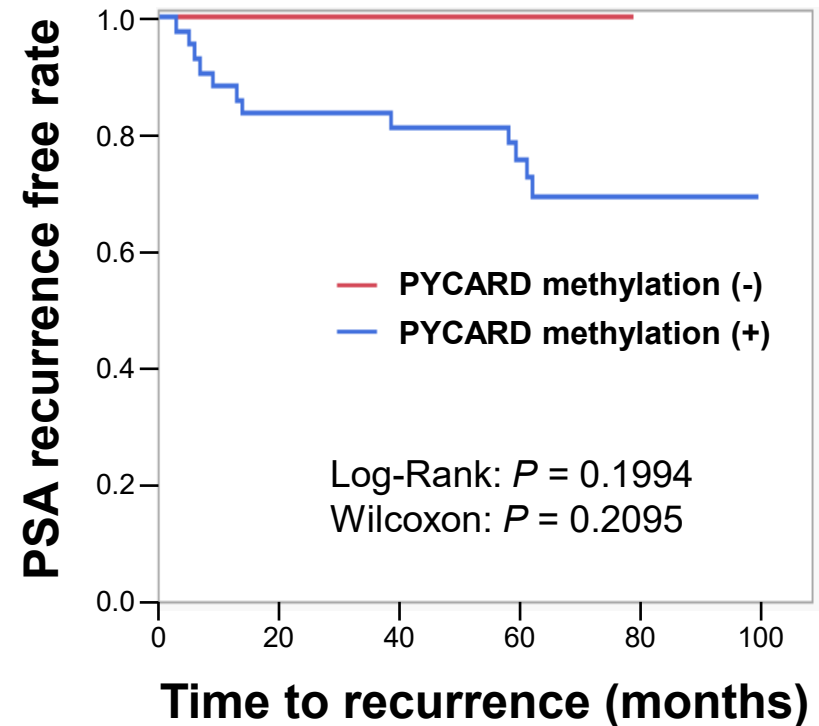

**Figure S3. The relationship between PSA recurrence free rate and *PYCARD* expression or *PYCARD* tumor-specific methylation.**

Kaplan-Meier analysis using 49 prostate cancer patients did not show any relationships between PSA recurrence free rate and *PYCARD* expression (A) or *PYCARD* tumor-specific methylation (B). Postoperative PSA levels in case #37 did not drop to undetectable levels (0.2 ng/ml). Therefore, we excluded this case from Kaplan-Meier analysis.
